# Supplementary material for: Exploiting Arginine Auxotrophy with Pegylated Arginine Deiminase (ADI-PEG20) to Sensitize Pancreatic Cancer to Radiotherapy via Metabolic Dysregulation
Source: Oxford University Press journal article supplement (doi:10.1158/1535-7163.mct-18-0708), 2019-08-08
Supplement: 15357163mct180708-sup-204191_3_supp_5682213_pvtk5k.pdf [file 15357163mct180708-sup-204191_3_supp_5682213_pvtk5k.pdf]

Experimental Plan  
**ADI-PEG20-mediated radiosensitization of pancreatic cancer cell xenografts**

(A) Tumor growth delay

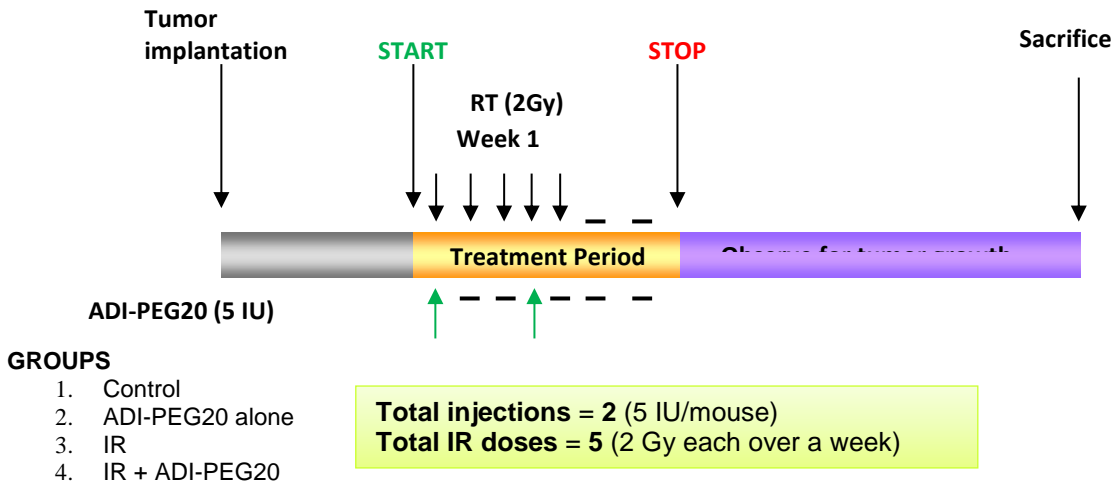

- GROUPS**
1. Control
  2. ADI-PEG20 alone
  3. IR
  4. IR + ADI-PEG20

(B) Histologic studies

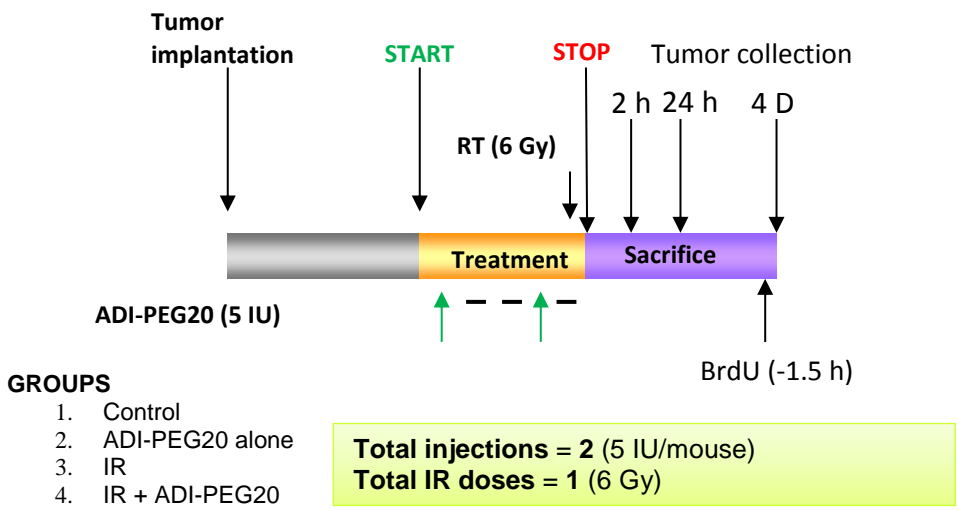

- GROUPS**
1. Control
  2. ADI-PEG20 alone
  3. IR
  4. IR + ADI-PEG20

**Suppl. Fig S1.** Illustration of experimental design for (A) tumor growth delay assays and (B) histologic studies in pancreatic cancer mouse xenograft models. For the tumor growth delay assay, tumors were allowed to reach 5-8mm in diameter following implantation and then subjected to 5 daily treatments with focal 2Gy radiation (total 10 Gy) with ADI-PEG20 given on day 1 and day 4 of radiation, followed by twice-weekly tumor measurement for up to 30 days. For the histological studies, tumors were allowed to reach 5-8mm in diameter and then treated with ADI-PEG20 on days 1 and 3 followed by a single dose of radiation of 6 Gy. Tumors were then extracted 2 h, 24 h and 4 d later for histological studies. BrDu was administered 1.5 hours before tumors were extracted for assessment of proliferation index.
